# Supplementary material for: Shift work is associated with an increased risk of Type 2 diabetes and elevated RBP4 level: cross sectional analysis from the OHSPIW cohort study
Source: Research Square preprint supplement (doi:10.21203/rs.3.rs-1983371/v1), 2022-09-01
Supplement: Supplementary file 1 [file 54b156022dc2d9775bf029f4.xlsx]

## Sheet: tab3
Table 3 Multivariate regression estimates of the effect of shift-work exposure on RBP4 after adjusting for covariates.
Outcome variables	Partial regression coefficient	95%CI	P-value	Overall model fit
RBP4 a	9.78	9.10-10.47	0.000	F=265.14, R2=0.88, p=0.000
RBP4 b	9.42	8.83-10.02	0.000	F=298.24, R2=0.91, p=0.000
RBP4 c	9.51	8.92-10.11	0.000	F=190.66, R2=0.91, p=0.000
In addition to shift work expourse, models were adjusted for: a: adjusted for age, sex and BMI; b:adjusted for age, sex, BMI and diabetes; c:adjusted for age, sex, BMI, diabetes, PSQI, family income, tobacco smoking and alcohol drinking.
