# Supplementary material for: Shift work is associated with an increased risk of Type 2 diabetes and elevated RBP4 level: cross sectional analysis from the OHSPIW cohort study
Source: Research Square preprint supplement (doi:10.21203/rs.3.rs-1983371/v1), 2022-09-01
Supplement: Supplementary file 2 [file b651fee59bce39bef44971c5.xlsx]

## Sheet: tab1
Table 1 The characteristics of participants according to shift work status
Demographic	All subjects	Non-shift workers	shift workers	P-value
characteristics	(n=1499)	(n=737)	(n=762)
	Mean±SD or n(%)	Mean±SD or n(%)	Mean±SD or n(%)
Age (years)	40.82±8.31	41.34±8.36	40.31±8.23	0.017
Sex
male	751(50.1)	408(55.4)	343(45.0)	<0.001
female	748(49.9)	329(44.6)	419(55.0)
BMI	24.39±3.59	24.19±3.54	24.57±3.64	0.044
Education level
Primary school and below
Junior school	1055(70.4)	508(68.9)	547(71.8)	0.285
High school	433(28.9)	225(30.5)	208(27.3)
College and higher	11(0.7)	4(0.5)	7(0.9)
Family income (RMB/monthly)
≤4000	469(31.3)	262(35.5)	207(27.2)	<0.001
>4000	1030(68.7)	475(64.5)	555(72.8)
Marital status
cohabiting	1180(78.7)	588(79.8)	592(77.7)	0.322
other	319(21.3)	149(20.2)	170(22.3)
Tobacco smoking
Never	995(66.4)	465(63.1)	530(69.6)	0.026
Ever	150(10.0)	78(10.6)	72(9.4)
Current	354(23.6)	194(26.3)	160(21.0)
Alcohol drinking
Never	747(49.8)	334(45.3)	413(54.2)	<0.001
Ever	575(38.4)	297(40.3)	278(36.5)
Current	117(11.8)	106(14.4)	71(9.3)
Diabetes
yes	81(5.4)	31(4.2)	50(6.6)	0.044
no	1418(94.6)	706(95.8)	712(93.4)
Family history of diabetes/ hypertension/ coronary heart disease
yes	400(27.2)	185(26.2)	215(28.2)	0.378
no	1099(72.8)	522(73.8)	547(71.8)
