# Supplementary material for: Shift work is associated with an increased risk of Type 2 diabetes and elevated RBP4 level: cross sectional analysis from the OHSPIW cohort study
Source: Research Square preprint supplement (doi:10.21203/rs.3.rs-1983371/v1), 2022-09-01
Supplement: Supplementary file 3 [file bc17707489859c6a9fb75650.xlsx]

## Sheet: tab2
Table 2 The global scores and the mean PSQI component according to shift work status
Variables for PSQI	All subjects	Non-shift workers	shift workers	P-value
	(n=1499)	(n=737)	(n=762)
	Mean score±SD	Mean score±SD	Mean score±SD
PSQI global score	6.45±3.15	5.99±2.87	6.89±3.35	0.000
Subjective sleep quality	1.24±0.75	1.15±0.70	1.32±0.78	0.000
Sleep latency	1.33±0.92	1.19±0.89	1.48±0.92	0.000
Sleep duration	0.91±0.61	0.86±0.61	0.96±0.62	0.003
Habitual sleep efficiency	0.26±0.63	0.22±0.59	0.31±0.67	0.007
Sleep disturbances	1.06±0.57	1.00±0.51	1.12±0.61	0.000
Use of sleep medication	0.22±0.61	0.21±0.59	0.24±0.63	0.408
Daytime dysfunction	1.42±0.86	1.36±0.81	1.47±0.90	0.013
